# Supplementary material
Source: PubMed Central journal article supplement (PMC7610658)
Supplement: EMS121968-supplement-Supplementary_Materials.pdf [file EMS121968-supplement-Supplementary_Materials.pdf]

**SUPPLEMENTARY MATERIALS:**

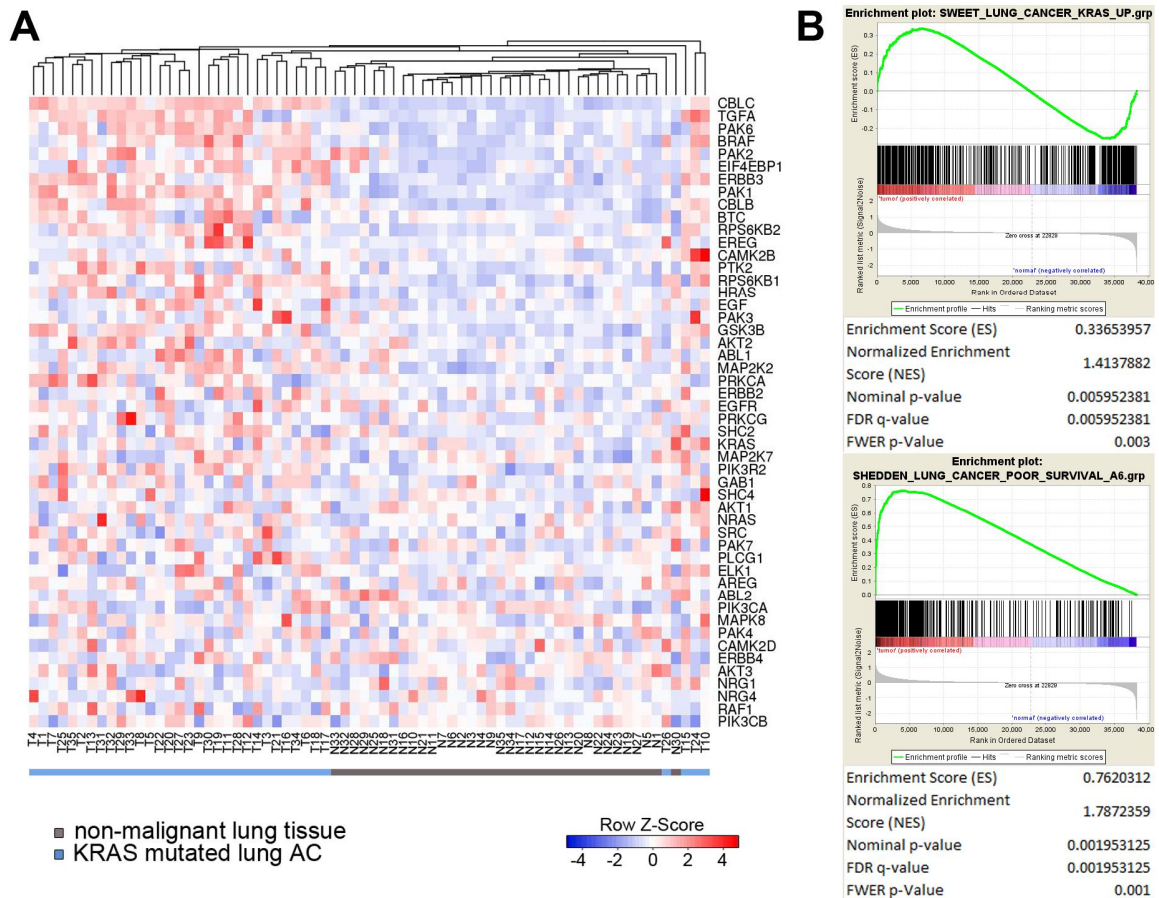

**Fig. S1:** K-RAS mutated lung AC display increased ERBB expression profile. **(A)** Heat map for mRNA expression in K-RAS mutated tumor biopsies (T1-T35) and adjacent non-malignant, healthy lung parenchyma (N1-N35). Displayed are the 50 most differentially regulated genes within the KEGG ERBB signaling pathway and hierarchical clustering was performed using the heatmapper.ca webtool. **(B)** GSEA for indicated gene sets in K-RAS tumors versus healthy normal tissue. Data in **(A)** and **(B)** was retrieved from the Gene Expression Omnibus (GSE75037).

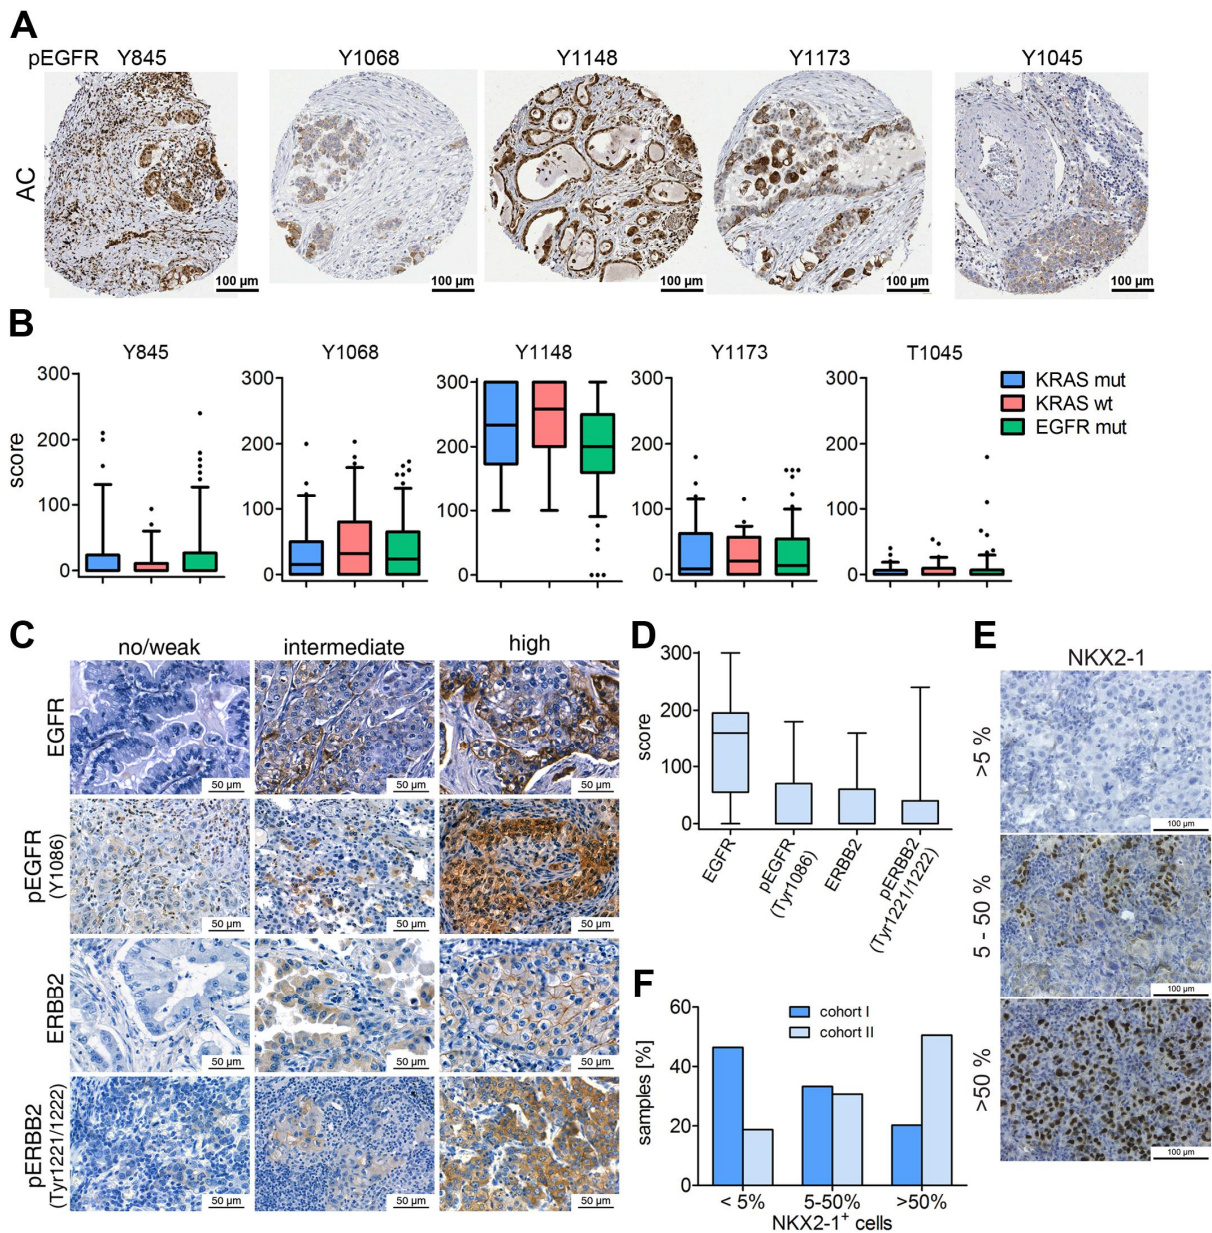

**Fig. S2: K-RAS mutated lung AC exhibit activated EGFR.** (A) Low magnification of representative immunohistological stainings for indicated phosphorylation sites in human lung AC samples harboring *K-RAS* mutations. (B) Comparison of scores for indicated EGFR phosphorylation sites in tumor cells of human lung AC harboring mutated *K-RAS* (n=31-35), wildtype (wt) *K-RAS* (n=31-32) or mutated *EGFR* (n=65). (C) Representative

immunohistochemical stainings for total and (phospho-) EGFR and ERBB2 with non/weak, intermediate and strong staining intensity in human K-RAS mutated lung AC and **(D)** boxplot (min to max) of scoring values. n×35 per group. **(E)** Representative pictures of NKX2-1 staining in *K-RAS* mutated human lung AC tissue samples showing tumors with <5 %, 5-50% and >50% of NKX2-1 positive tumor cells. **(F)** Distribution of NKX2-1 positive tumor cells in the two different cohorts of *K-RAS* mutated lung AC samples used for analysis of EGFR expression/activation.

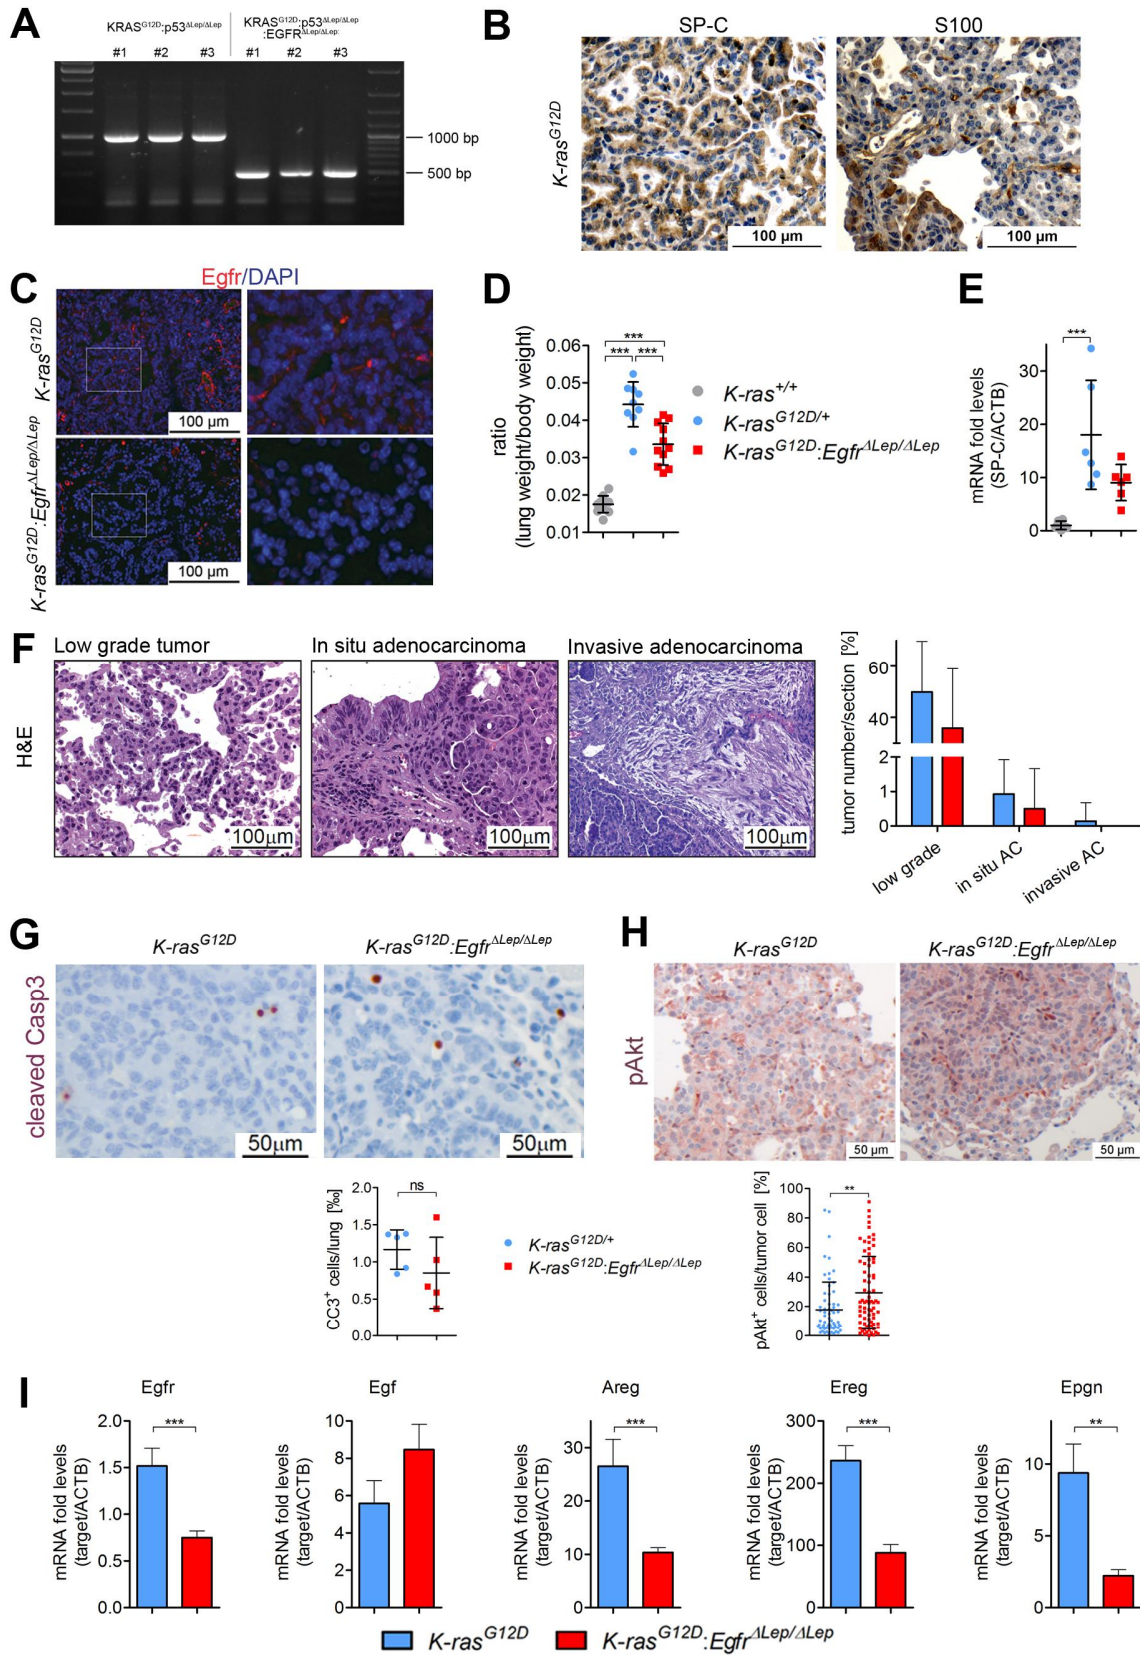

**Fig. S3: Genetic EGFR ablation in K-RAS mutated lung AC reduces tumor growth. (A)** Genotyping of cell lines isolated from lungs following death of respective mice used for survival analysis. The ~ 1 kb band shows wildtype EGFR, whereas the ~ 500 bp band indicates the recombined EGFR allele. **(B)** Representative pictures of stainings for SP-C and S100 in tumors of K-ras<sup>G12D</sup> mice and **(C)** representative picture of immunofluorescence staining for Egfr including higher magnification of indicated area (right panel) in tumors of K-ras<sup>G12D</sup> and K-ras<sup>G12D</sup>:Egfr<sup>ΔLep/ΔLep</sup> mice. (n=5 per group). **(D)** Ratios of lung weight over body weight of tumor free wildtype, K-ras<sup>G12D</sup> and K-ras<sup>G12D</sup>:Egfr<sup>ΔLep/ΔLep</sup> mice, 10 weeks post inhalation with Ad.Cre. (n=9-11 mice per group). Graph represent mean ± s.d., \*\*\*P<0.001. **(E)** Relative *SP-C* mRNA expression levels in total lung lysates of tumor free wildtype, K-ras<sup>G12D</sup> and K-ras<sup>G12D</sup>:Egfr<sup>ΔLep/ΔLep</sup> mice, 10 weeks post tumor initiation, normalized to *Actb* mRNA expression. Graph represent mean ± s.d., \*\*\*P<0.001. **(F)** Representative pictures of low grade, *In situ* AC and invasive AC as classified by board certified pathologists, and tumor numbers of respective tumors in lungs of K-ras<sup>G12D</sup> and K-ras<sup>G12D</sup>:Egfr<sup>ΔLep/ΔLep</sup> mice. n=14 for K-ras<sup>G12D</sup> and n=18 for K-ras<sup>G12D</sup>:Egfr<sup>ΔLep/ΔLep</sup>. **(G), (H)** Immunohistochemistry for cleaved Caspase 3 and pAkt in tumors of indicated mice, 10 weeks post Ad.Cre inhalation. Graphs represent mean ± s.d. of the percentage of Caspase 3 positive cells in whole lung sections and pAkt positive tumor cells in at least 8 individual tumors per mouse as evaluated using TissueGnostics software. (n×5 mice per group). \*\*P<0.01 **(I)** Relative mRNA expression of *Egfr* and Egfr ligands in lung lysates of K-ras<sup>G12D</sup> and K-ras<sup>G12D</sup>:Egfr<sup>ΔLep/ΔLep</sup> mice, 10 weeks post Ad.Cre inhalation, normalized to *Actb* mRNA expression (n×6). Bars represent mean values + s.d. \*\*P<0.01, \*\*\*P<0.001.

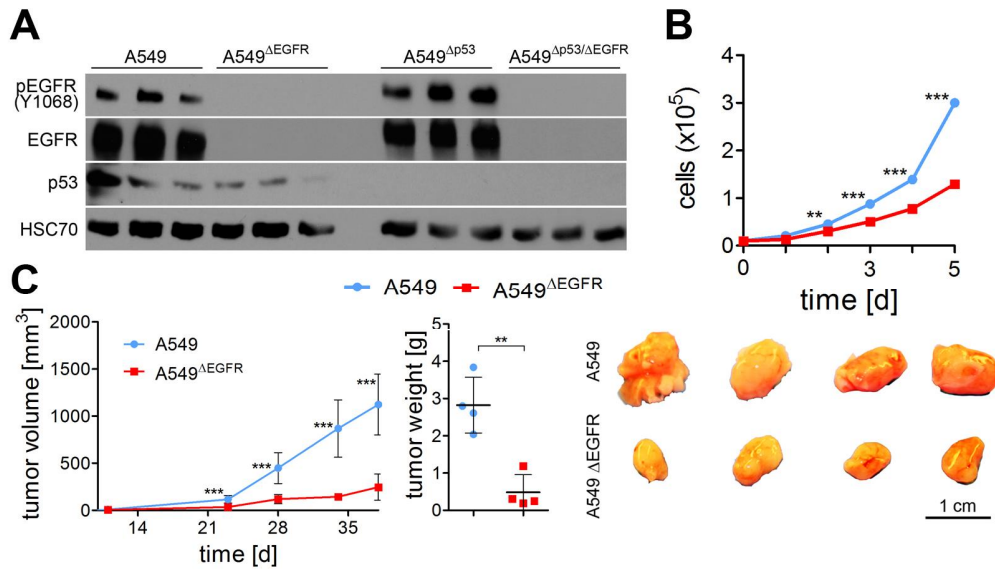

**Fig. S4: Genetic EGFR ablation in K-RAS mutated lung AC cells reduces tumor growth. (A)** Western blot of A549, A549<sup>ΔEGFR</sup>, A549<sup>Δp53</sup>, A549<sup>Δp53/ΔEGFR</sup> cells probing for indicated proteins and **(B)** cell counts at indicated time points of A549 (blue line) and A549<sup>ΔEGFR</sup> (red line) following standard cultivation *in vitro* (n=3 clones per group). **(C)** Mean tumor volumes of xenografted A549 and A549<sup>ΔEGFR</sup> cells monitored over the course of the experiment and endpoint tumor weight ± s.d. are indicated (n=4 per group). Picture of tumors after finalizing the experiment is shown. **(B), (C)** Unpaired two-tailed t-test for individual time points and tumor weight. \*\*p<0.01, \*\*\*p<0.001.

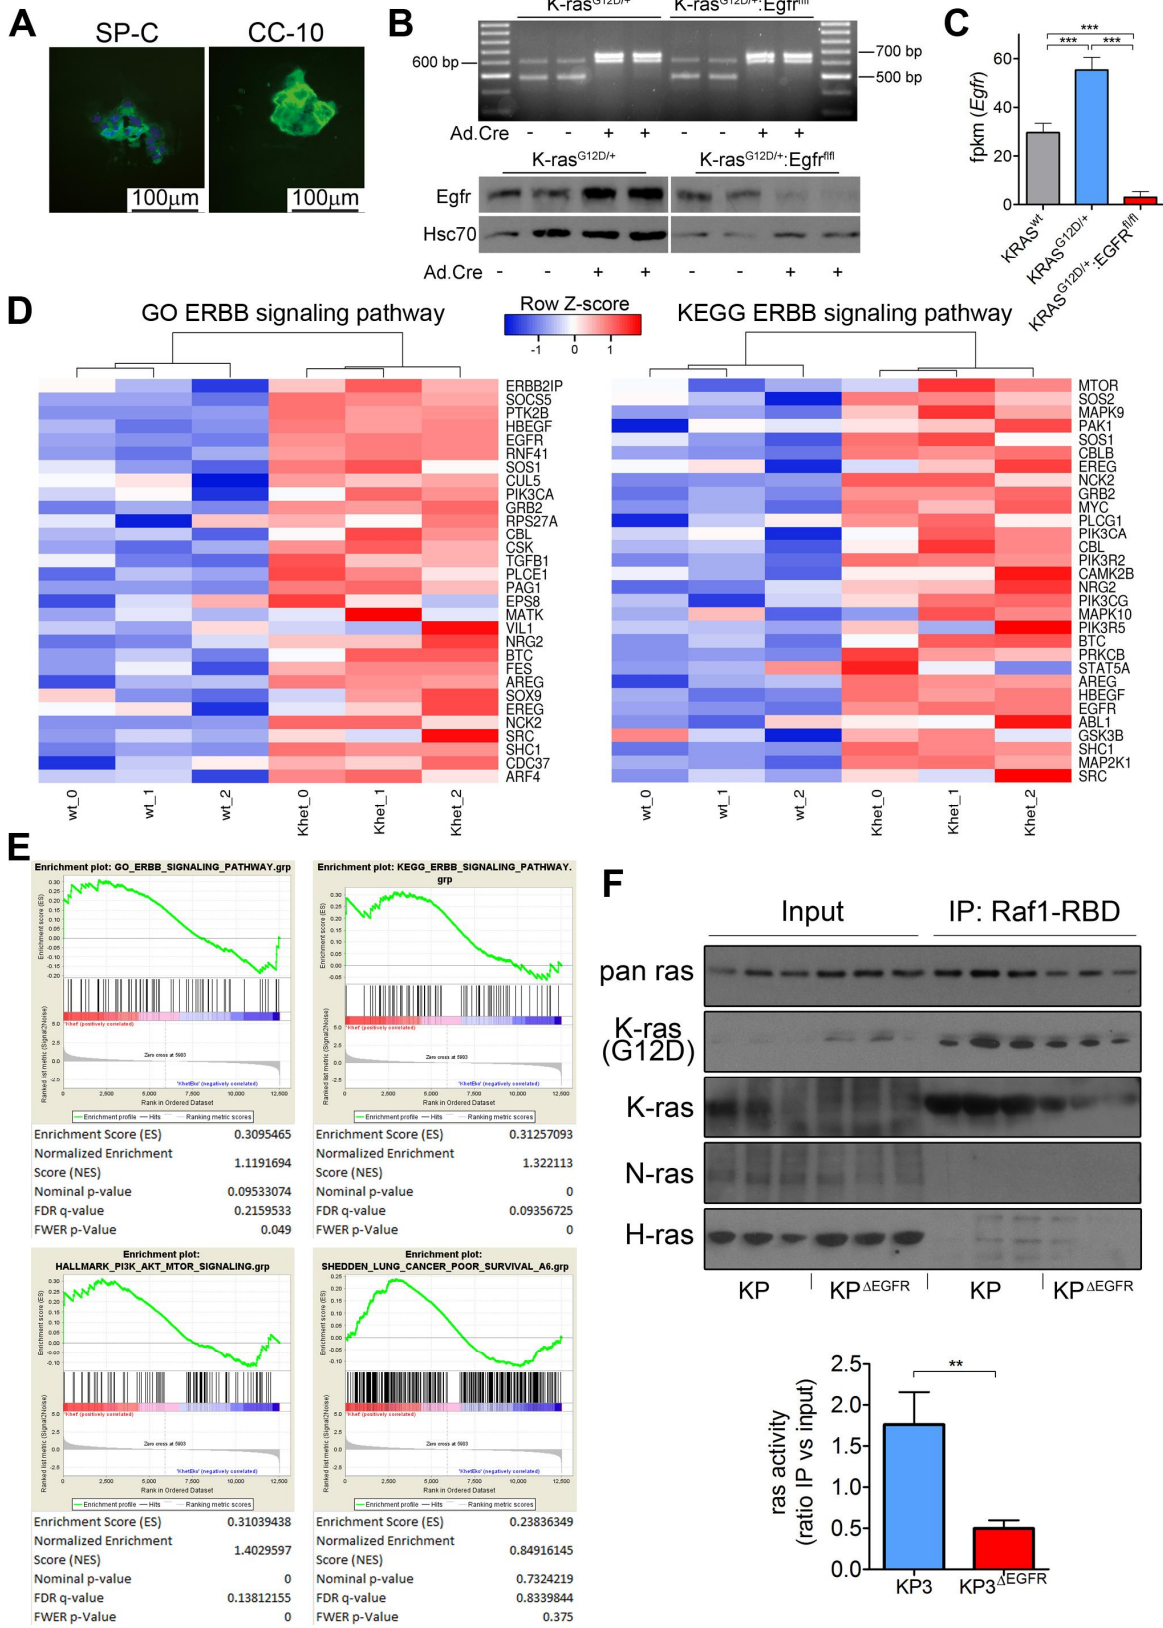

**Fig. S5: Inhibition of EGFR signaling downregulates mutated K-RAS activity. (A)** Immunofluorescence staining of primary lung cell isolates for SP-C and CC-10 expression. **(B)** PCR analysis for recombination of the KRAS<sup>G12D</sup> allele (~500 kb: LSL-G12D, ~620 kb: wildtype, ~650 kb: recombined G12D) and Western blot probing for EGFR and HSC70 expression in primary pneumocytes isolated from K-ras<sup>G12D/+</sup> and K-ras<sup>G12D</sup>:Egfr<sup>fl/fl</sup> mice. Cells were transduced with 250 MOI Ad.Cre 2 days before cell lysis. **(C)** *Egfr* mRNA expression in primary pneumocyte isolates of wildtype, K-ras<sup>G12D/+</sup> and K-ras<sup>G12D</sup>:Egfr<sup>fl/fl</sup> mice 5 days post Ad.Cre transduction. (n=3), one way ANOVA, \*\*\*p<0.001. **(D)** Heat map illustrating expression of top 30 induced genes in the GO and KEGG ERBB signaling pathway, comparing Ad.Cre transduced pneumocytes isolated from wildtype (wt\_0-2) and K-ras<sup>G12D/+</sup> (Khet\_0-2) mice. **(E)** GSEA for depicted gene sets, comparing RNAseq data of transduced pneumocytes isolated from K-ras<sup>G12D/+</sup> (Khet) and K-ras<sup>G12D</sup>:Egfr<sup>fl/fl</sup> (KhetEko) mice. **(F)** Western blot analysis of KP and KP<sup>ΔEGFR</sup> cell lysates before and after pulldown with Raf1-RBD and probing for indicated proteins. Due to the similar molecular weight of ras isoforms, each protein was probed on an individual membrane. Blot represents ratio of densitometric values for the Ras signal in pulldowns over input. (n=3), \*\*p<0.01



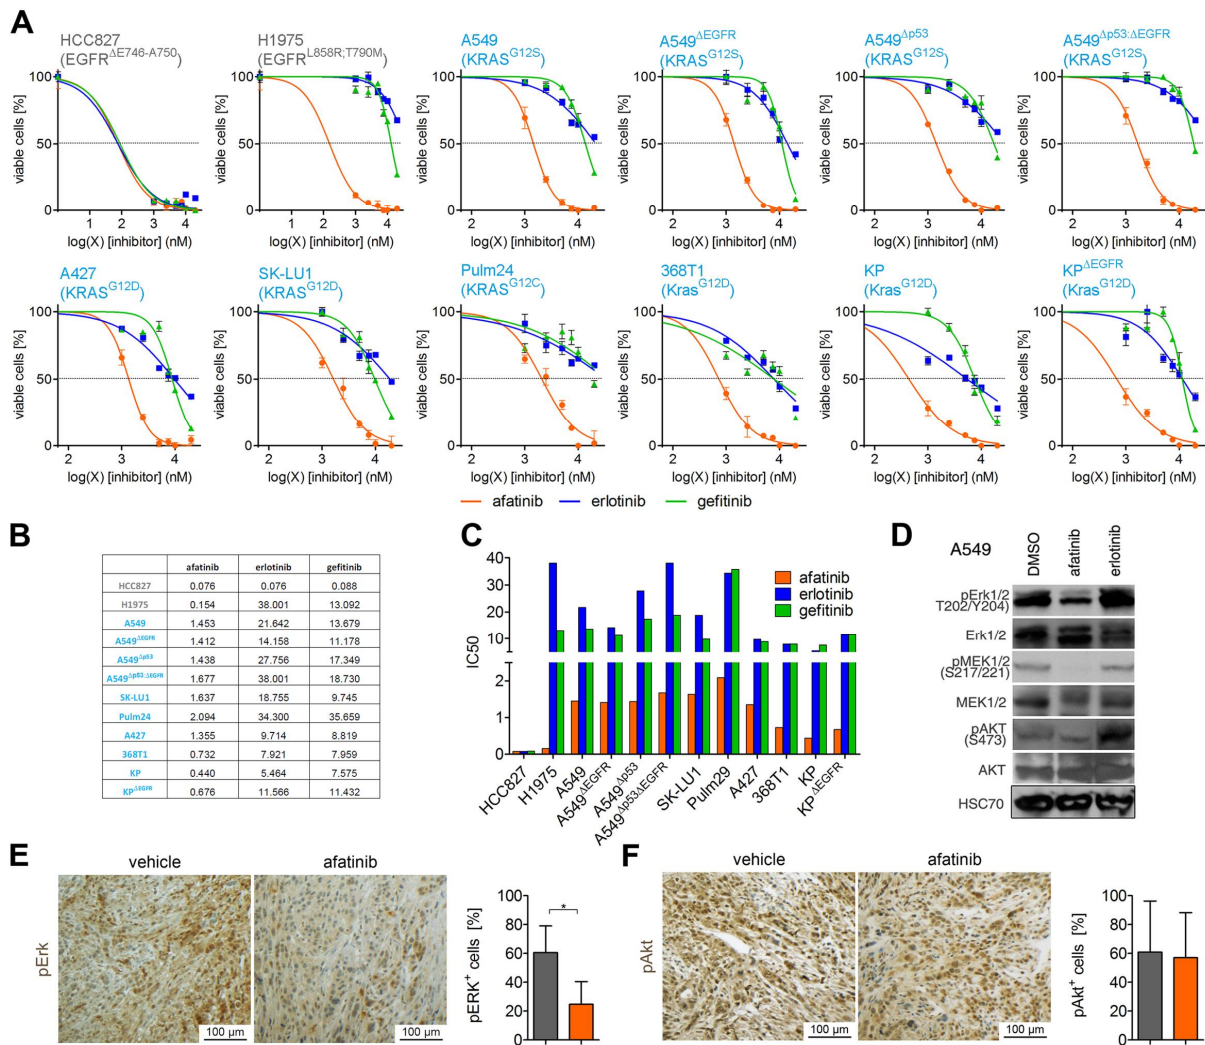

**Fig. S6: Afatinib reduces growth of K-RAS mutant lung AC in vitro.** (A) Cell viability of lung cancer cell lines harboring mutations in the *EGFR* or *K-RAS* gene as indicated, following 3 day treatment of escalating doses afatinib, erlotinib or gefitinib, as determined by MTT assay. (B), (C) IC50 values as determined in (A) are displayed. (D) Western blot analysis probing for indicated (phospho) proteins in cell lysates of A549 cells after 24h treatment with 1  $\mu$ M afatinib and erlotinib, respectively. (E) Representative pictures of pErk and (F) pAkt staining of 368T1 cell line derived grafts upon vehicle and afatinib treatment in tumors harvested at the end of the experiment. Graphs illustrate the quantitation of positive cells for the respective staining as determined using TissueGnostics software (n=5).

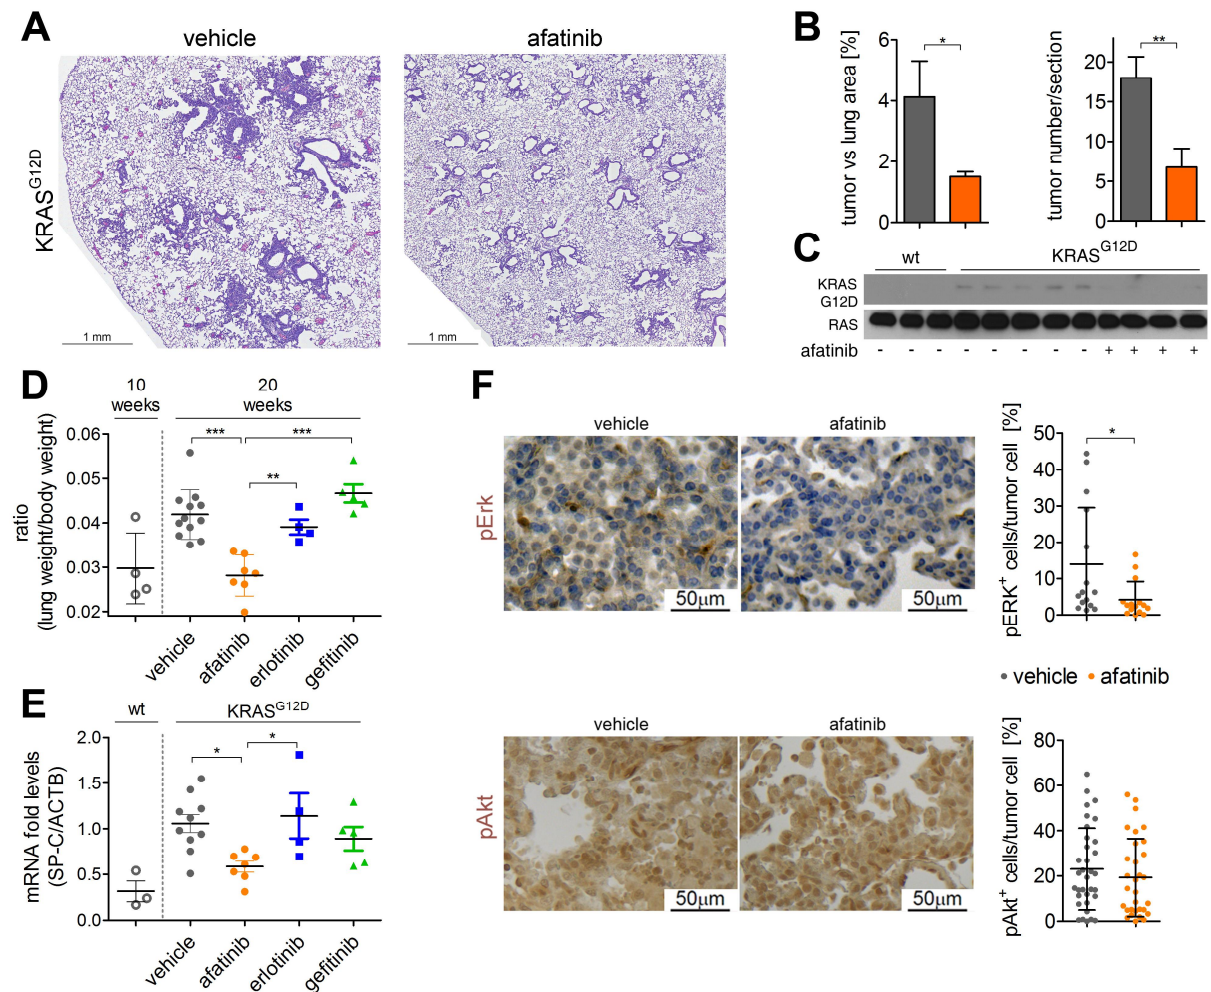

**Fig. S7: Afatinib reduces K-RAS mediated tumorigenesis in vivo.** (A) Representative pictures of H&E stained lung sections of  $Kras^{G12D/+}$  mice 10 weeks post Ad.Cre inhalation and treatment over the last 9 weeks with vehicle or afatinib (5 mg/kg body weight, 5 times per week via oral gavage). (B) Graphs represent mean of ratios + s.d. of tumor area versus total lung area and mean of tumor numbers + s.d. per section of lung of mice. Unpaired two-tailed t-test for individual time points and tumor weight. \* $p < 0.05$ , \*\* $p < 0.01$ . (C) Western blot of lysates of lung derived from mice treated as in (A), using antibody specific for mutant K-RAS<sup>G12D</sup> as a measurement for quantitation of tumor cells and for total RAS as control. (A)-(C)  $n = 5$  for vehicle group and  $n = 4$  for afatinib group. (D) Ratios of lung weight over body weight of K-ras<sup>G12D</sup> mice 10 weeks post

inhalation with Ad.Cre and after 20 weeks post inhalation and treatment with vehicle, afatinib, erlotinib or gefitinib for the last 10 weeks of the experiment (5 mg/kg body weight, 5 times per week via oral gavage, n=4-11 mice per group). Graph represent mean  $\pm$  s.d., \*\*p<0.01, \*\*\*P<0.001. **(E)** Relative *SP-C* mRNA expression levels in total lung lysates of tumor free wildtype and K-ras<sup>G12D</sup> mice treated as in **(D)**, normalized to *Actb* mRNA expression. Graph represent mean  $\pm$  s.d., \*p<0.05. **(F)** Representative pictures of pErk and pAkt staining of lung tumors 20 weeks post Ad.Cre induction and 10 weeks of vehicle versus afatinib treatment. Tumor cells positive for respective stainings in at least 3 tumors per mouse were quantitated using TissueGnostic software, and blot indicates mean  $\pm$  s.d. of the percentage of positive tumor cells (n=4 mice per group).

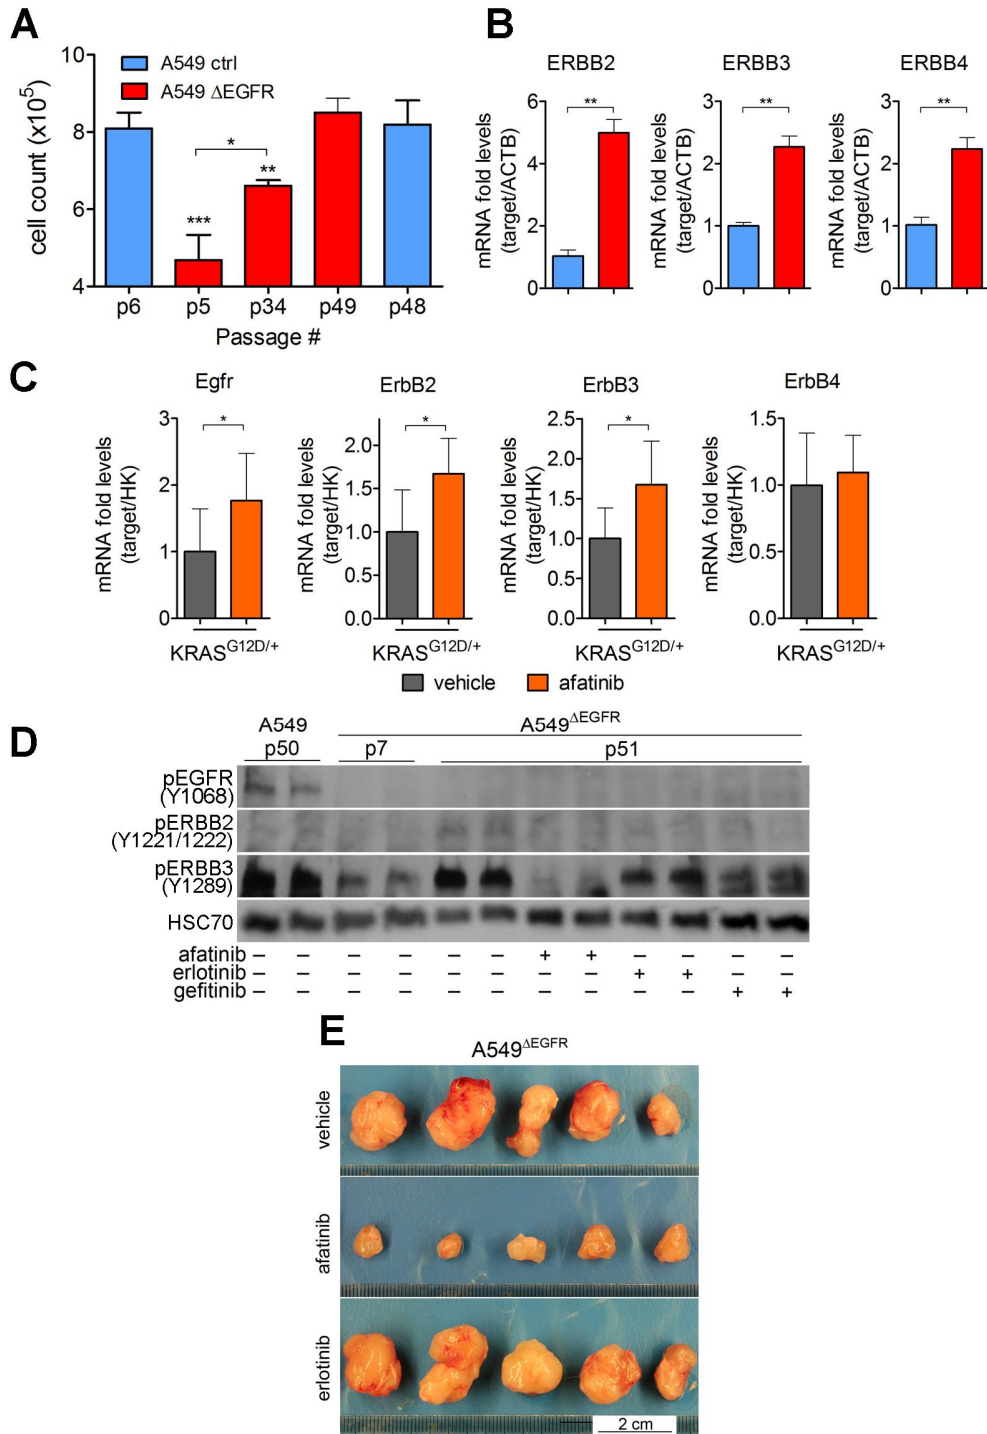

**Fig. S8:** ERBB family members mediate resistance to EGFR inhibition, which can be blocked by afatinib. **(A)** Cell counts of A549 and A549<sup>ΔEGFR</sup> cells of different passages after clonal expansion, after seeding equal cell numbers and 3 days incubation. **(B)** Relative mRNA

expression levels of ERBB family members in A549 and A549<sup>ΔEGFR</sup> cells, normalized to *ACTB* expression. n=3 per group. (C) Relative mRNA expression in lung lysates of KRAS<sup>G12D</sup> mice, 20 weeks after tumor induction and ten weeks after start of vehicle or afatinib treatment (5 mg/kg body weight, 5 times per week via oral gavage, n=8 per group). (D) Western blot analysis of A549 cells and A549<sup>ΔEGFR</sup> cells in low passage (p7) and higher passage (p51), untreated and treated with 1 μM afatinib, erlotinib or gefitinib for 24 h. (E) Photographs of A549<sup>ΔEGFR</sup> xenografts in mice receiving indicated treatments harvested at the end of experiment. (A) - (C) Unpaired two-tailed t-test for individual time points and tumor weight. \*p<0.05, \*\*p<0.01, \*\*\*p<0.001

| > Genes up-regulated in primary lung alveolar cells upon KRAS G12D transduction |               |               |                |               |                |               |
|---------------------------------------------------------------------------------|---------------|---------------|----------------|---------------|----------------|---------------|
| F630028O10Rik                                                                   | Isg15         | En1           | Tgfb1          | Kcnd1         | Plcb2          | Cp            |
| Mir223                                                                          | Ubn2          | Ccm2l         | Fcer1g         | Txk           | Snph           | Lce1f         |
| Tgtp2                                                                           | mmu-mir-7670  | Mcpt8         | Saa3           | Trpc6         | Mmp12          | Gm13086       |
| Gm8730                                                                          | Fcgr2b        | Pdgfra        | Nfam1          | Rgs4          | Parp1          | Gata4         |
| MIAT_exon1                                                                      | Cdc136        | mmu-mir-7025  | Lrm2           | Ugt1a1        | mmu-mir-6904   | Rinl          |
| MIAT_exon5_1                                                                    | Gm26220       | Tnfaipl8l2    | Rgs20          | Ugt1a10       | Il16           | Xirp2         |
| MIAT_exon5_2                                                                    | Ifi204        | Rhox5         | Dnajc6         | Ugt1a2        | Fam13a         | Bcl3          |
| MIAT_exon5_3                                                                    | Cbs           | Gm16241       | Pcdh10         | Ugt1a5        | Abcb1a         | Rep15         |
| Miat                                                                            | Hormad2       | Gm20400       | Vwc2           | Ugt1a6a       | Ribc1          | Bcl2a1b       |
| Arg1                                                                            | Fcgr1         | Card11        | Oas1b          | Ugt1a6b       | Ubash3b        | Mthfs         |
| Wfdc17                                                                          | Aqp4          | Mmp9          | Car12          | Ugt1a7c       | Il18           | Stc1          |
| Ccr2                                                                            | Cd300lf       | Pyhin1        | Csf2rb         | Ugt1a8        | Gucy2g         | Atp6v0d2      |
| Hnf4a                                                                           | Sifn10-ps     | Lama1         | mmu-mir-7676-2 | Ugt1a9        | Lgals3bp       | 2610018G03Rik |
| Gm20746                                                                         | Gm12505       | Oas3          | Gm2302         | 4930431P03Rik | Gm13431        | Slc7a2        |
| Gm26445                                                                         | Ccr1          | Gme           | Sash3          | Gm17173       | Cpa4           | Laptm5        |
| Abca8a                                                                          | Snx20         | C1qb          | Tnni1          | Ppp1r3a       | Sv2a           | Gfra2         |
| Cacng8                                                                          | Fcrls         | Trem12        | Selp1g         | Gabra3        | Arhgap6        | Adams14       |
| Gm23450                                                                         | Samsn1        | Gda           | Gap43          | Wt1           | Cpxm1          | Trem2         |
| Gm25043                                                                         | Gm14165       | Gad1          | Il10ra         | Klra4         | Cebpd          | Stxbp3b       |
| Oas2                                                                            | Gm9285        | Glip1r        | Chi3l3         | Cd38          | Gm22413        | C3ar1         |
| Onecut3                                                                         | Mir1894       | Ifi44         | Rph3a          | B3gnt8        | Gria3          | B430306N03Rik |
| Irg1                                                                            | Ppp1r10       | Fcgr3         | Igtp           | Plek          | Inpp4b         | Cd28          |
| Ccl4                                                                            | Soga3         | Trim30a       | Irgm2          | Cyp7b1        | Clec4e         | Cmb1          |
| Ccl6                                                                            | Rgs5          | Cd86          | Sp5            | Iglon5        | Oas1a          | Fcgr4         |
| Ifi205                                                                          | Tnfsf8        | Tlr8          | Cd200r3        | Sp1           | Sprr2h         | Pde1a         |
| S100a9                                                                          | Xaf1          | Sifn5         | Pamr1          | C330013J21Rik | Ano3           | Dll4          |
| Ngp                                                                             | Ddx60         | Nptx1         | Serpina3n      | Elavl2        | Vdr            | A230050P20Rik |
| Atp1a3                                                                          | A1662270      | Adap2         | Ptafr          | Vmn1r-ps128   | Atp8b4         | Lrrc2         |
| Sifn8                                                                           | Traf3ip3      | Gm17384       | Clec7a         | Paqr5         | Gm13105        | Clec4d        |
| Ednra                                                                           | Srgn          | Aqp9          | Gata5          | Dock10        | Aldh1b1        | Gm26848       |
| Tifab                                                                           | Cd2           | Mnda          | Gm15280        | Cnr2          | Gm15287        | Slc27a3       |
| Tnfsf11                                                                         | Ifit1         | Klra2         | Gbp7           | Pex5l         | Gpr64          | Rspo3         |
| Syt9                                                                            | Msr1          | Rtp4          | Icosl          | Vstm2a        | Mir31          | Neto1         |
| Bin2                                                                            | Ptpn7         | Dusp15        | Il21r          | Fam84a        | Il6            | Trac          |
| Ccl3                                                                            | Ano4          | Ltf           | Trim15         | Nlrp3         | Wnt2           | Traj32        |
| Il33                                                                            | Ndst3         | BC028471      | Rac2           | A330021E22Rik | 9330132A10Rik  | Traj33        |
| Pax5                                                                            | Cd52          | Gm20488       | Asic3          | Hs3st1        | Dok6           | Gm12177       |
| Lcp2                                                                            | C5ar1         | Medag         | Pla2g7         | Ivi           | Lifr           | Nhs           |
| Steap4                                                                          | Oasl2         | Crabp2        | Aim2           | B3gnt7        | C2             | Adams9        |
| Ccr5                                                                            | Ifi203        | Gp49a         | Myo1g          | Pri2c2        | Cfb            | Siglec1       |
| Ednrb                                                                           | Mndal         | Lilrb4        | Stra6          | Lrrc3b        | Gm20547        | Serpina3g     |
| Sifn2                                                                           | Dlx4          | Cd200r1       | Serpina1a      | Mcm7          | Ccdc88b        | Serpina3h     |
| S100a8                                                                          | Apol9b        | Gbp6          | Ptprc          | Mir25         | Gli2           | Serpina3i     |
| Csf2                                                                            | Ilgam         | F13a1         | Il24           | Mir93         | Osmr           | Espn          |
| Gm1840                                                                          | Ncf4          | A8124611      | Fam78b         | Calcb         | Stat2          | Gabre         |
| Star                                                                            | Lrmp          | Slit3         | Igfbp3         | Socs3         | I8300120A16Rik | Mir224        |
| Dock3                                                                           | Apol9a        | Il1a          | Olr1           | 1200007C13Rik | Ifit3          | Kif17         |
| Gm22238                                                                         | Tfr2          | Cd53          | Plk1s1         | Nckap1l       | Ilgb2          | Sh2d5         |
| Oasl1                                                                           | RP24-312B12.1 | Gm4070        | Gm11747        | Syt13         | Gabrq          | Gm14418       |
| Gm11425                                                                         | Clec5a        | RP24-196H4.1  | Sim2           | Csn3          | Neu3           | Mrc1          |
| Arrb2                                                                           | Kcnt1         | Tmem74b       | Ccbe1          | Mfap2         | Ifitm3         | Gm16564       |
| mmu-mir-7115                                                                    | Plat          | Cxcl1         | Cyth4          | Klhl1         | Susd1          | Rpgr          |
| Pri2c5                                                                          | Gbp5          | AW011738      | Pilra          | Gm13293       | Hey1           | Srpx          |
| Serpina10                                                                       | Spry3         | Adam22        | Cd5            | Tmem179       | Fermt3         | Akap12        |
| Serpina2                                                                        | Cd33          | Tlr13         | 4833427G06Rik  | Arl11         | Pcdh11x        | Spock3        |
| Wnt4                                                                            | C1qa          | C1qc          | Gpr88          | Ncf2          | Trim66         | Ptprn         |
| Ifi2712a                                                                        | Irf7          | Lgi2          | Kcnk12         | Coro1a        | Arsi           | Cyp11b1       |
| Gbp3                                                                            | Gm9625        | C1qtnf1       | Il1rn          | Rpp25         | Vcam1          | Abca1         |
| Ntrk2                                                                           | Ahgap30       | Pf4           | Lpxn           | Igkc          | Phf11d         | Stat1         |
| Zic1                                                                            | Ly86          | Emr1          | SMAD5-AS1_2    | Igkj4         | Cd14           | Galnt6        |
| Btk                                                                             | Pilrb2        | Gas1          | Smad5          | St8sia4       | Col5a3         | Alox5         |
| Wdfy4                                                                           | Pnma2         | Ptger2        | Nfkbi2         | Gm13227       | 1810011H11Rik  | Casp4         |
| Alox5ap                                                                         | Spp1          | Themis2       | Mmp8           | Gm13230       | Pabpc4l        | Atp2b4        |
| Scn5a                                                                           | Cd9           | Ccdc158       | Clec4n         | Pld4          | Rplp0-ps1      | mmu-mir-6903  |
| Gm12840                                                                         | Naip5         | F830016B08Rik | Npl            | Mettl20       | Ank1           | Angptl7       |
| Cd7                                                                             | Mx2           | Dnmt3l        | H19            | Abca9         | Tyrobp         | Sncap         |
| Gbp4                                                                            | C4b           | Scin          | Mir675         | Nrros         | Rnf213         | Hoxc6         |
| Gbp8                                                                            | Casp1         | Tnfaipl6      | Trim30d        | Kcnq5         | Angptl4        | Gbp2          |
| Gbp9                                                                            | Zbp1          | Gm13295       | Gm8995         | Cfn           | Cd1d1          | Adams4        |

Supplementary Table 1: Alveolar\_KRAS\_up gene set

| <b>conditional gene</b> |                   |                                 |
|-------------------------|-------------------|---------------------------------|
| <i>K-ras</i>            | primer #1 (5'-3') | GTCTTTCCCCAGCACAGTGC            |
|                         | primer #2 (5'-3') | CTCTTGCCTACGCCACCAGCTC          |
|                         | primer #3 (5'-3') | AGCTAGCCACCATGGCTTGAGTAAGTCTGCA |
| <i>Egfr</i>             | primer #1 (5'-3') | AAGTTTAAGAAACCCCGCTCTACT        |
|                         | primer #2 (5'-3') | GCCTGTGTCCGGGTCTCGTCG           |
|                         | primer #3 (5'-3') | CAACCAGTGACCTAGCCTGG            |
| <i>p53</i>              | primer #1 (5'-3') | CACAAAAACAGGTTAAACCCAG          |
|                         | primer #2 (5'-3') | AGCACATAGGAGGCAGAGAC            |

**Supplementary Table 2:** List of genotyping primers

| Target      | Sequence fwd primer(5'-3') | Sequence fwd primer(5'-3') |
|-------------|----------------------------|----------------------------|
| human EGFR  | GTGAACCCCGAGGGCAAATA       | ATTCCGTTACACACTTTGCGG      |
| human ERBB2 | TCCTCCTCGCCCTCTTGC         | AGTTCAGGTTTCCCTGCAC        |
| human ERBB3 | GGGACCGAGATGCTGAGATA       | GCCCAAAGCAGTGACCATTA       |
| human ERBB4 | CGGGCCATTCCACTTTACCA       | GAGCTTGATTGGGTGCTGTG       |
| human 28S   | CAGTTCTCTTGGGAATCCAG       | TTCAGCAAAGGAGTCAATCCAC     |
| human ACTB  | GCACAGAGCCTCGCCTTTGCC      | CATGCCACCATCACGCCCTGG      |
| mouse Egfr  | ACACTGCTGGTGTGCTGAC        | CCCAAGGACCACTTCACAGT       |
| mouse ErbB2 | GTCGCAACTTCATGTCGGTA       | GTGATCATCATGGAGCTGGC       |
| mouse ErbB3 | GGTACTGGTTGTCAGCATCG       | GTGCTGGGTTTCCTTCTCAG       |
| mouse ErbB4 | GGGATCTGAGACTTGCCAAA       | CAAGGCTCGGTACTGCTGTT       |
| mouse Egf   | CACCAATGCTGGTGATTG         | ACTGTCAGCCAGGTCCCTCTC      |
| mouse Ereg  | GATTCTCCTGGGATGCATGA       | CACCGAGAAAGAAGGATGGA       |
| mouse Epgn  | GCTTCAGCTCATGGTGGAAT       | CACAGCACAGCAGAGCAACT       |
| mouse Tgfa  | TGTGGCCCTGGCTGTCCTCA       | GCGCTGGGCTTCTCATGTCT       |
| mouse Areg  | TTGTCCTCAGCTAGGCAATG       | ATCATCCTCGCAGCTATTGG       |
| mouse SP-C  | TCCTGATGGAGAGTCCACCG       | ATCACCACGACAACGAGGAC       |
| mouse Actb  | GCTCATAGCTCTTCTCCAGGG      | CCTGAACCCTAAGGCCAACCG      |
| mouse 28S   | ATACCGGCACGAGACCGATAGTCA   | GCGGACCCACCCGTTTACCTC      |

**Supplementary Table 3: List of primers for qPCR analysis**

"This is the author's version of the work. It is posted here by permission of the AAAS for personal use, not for redistribution. The definitive version was published in Science Translational Medicine on 20 Jun 2018 Vol. 10, Issue 446, eaao2301, DOI: 10.1126/scitranslmed.aao2301"
